# Supplementary material for: Opportunities to improve the diagnosis and treatment of primary hyperparathyroidism: retrospective cohort study
Source: PubMed Central journal article supplement — Gland Surg. 2024 Jul 24;13(7):1201–13. doi: 10.21037/gs-24-128 (PMC11336797; doi:10.21037/gs-24-128), 2024-07-24
Supplement: gs-13-07-1201-dss.pdf [file gs-13-07-1201-dss.pdf]

## Data Sharing Statement

|                     |                                                                                                                                                     |                                                                                                                                                                                                                                                                                                                                                                                                                                                                                                                                                                                                                                                                                                                                                         |
|---------------------|-----------------------------------------------------------------------------------------------------------------------------------------------------|---------------------------------------------------------------------------------------------------------------------------------------------------------------------------------------------------------------------------------------------------------------------------------------------------------------------------------------------------------------------------------------------------------------------------------------------------------------------------------------------------------------------------------------------------------------------------------------------------------------------------------------------------------------------------------------------------------------------------------------------------------|
| <b>Article Info</b> | <a href="https://dx.doi.org/10.21037/gs-24-128">https://dx.doi.org/10.21037/gs-24-128</a>                                                           |                                                                                                                                                                                                                                                                                                                                                                                                                                                                                                                                                                                                                                                                                                                                                         |
| <b>Item</b>         | <b>Question</b>                                                                                                                                     | <b>Authors' Response<br/>(place "-" if not applicable)</b>                                                                                                                                                                                                                                                                                                                                                                                                                                                                                                                                                                                                                                                                                              |
| 1                   | Would you like to share data collected for your study to others?                                                                                    | No.                                                                                                                                                                                                                                                                                                                                                                                                                                                                                                                                                                                                                                                                                                                                                     |
| 2                   | If not, would you like to share the reason for your decision?                                                                                       | Data cannot be shared publicly because of clinical data privacy laws. The clinical data utilized in this study are not publicly available because they contain confidential information that may compromise patient privacy as well as the ethical or regulatory policies of our institution. Data are contained in the Mass General Brigham Research Patient Data Registry (RPDR, accessible at <a href="https://rc.partners.org/about/who-we-arerisc/research-patient-data-registry">https://rc.partners.org/about/who-we-arerisc/research-patient-data-registry</a> ), which may make data available upon the approval from institutional review boards. For further help contact <a href="mailto:rpdrhelp@partners.org">rpdrhelp@partners.org</a> . |
| 3                   | What data in particular will be shared?                                                                                                             | -                                                                                                                                                                                                                                                                                                                                                                                                                                                                                                                                                                                                                                                                                                                                                       |
| 4                   | Any other documents will be shared? Such as study protocol, statistical analysis plan, informed consent form, clinical study report, analytic code. | -                                                                                                                                                                                                                                                                                                                                                                                                                                                                                                                                                                                                                                                                                                                                                       |
| 5                   | When will data availability begin?                                                                                                                  | -                                                                                                                                                                                                                                                                                                                                                                                                                                                                                                                                                                                                                                                                                                                                                       |
| 6                   | When will data availability end?                                                                                                                    | -                                                                                                                                                                                                                                                                                                                                                                                                                                                                                                                                                                                                                                                                                                                                                       |
| 7                   | To whom will you share the data?                                                                                                                    | -                                                                                                                                                                                                                                                                                                                                                                                                                                                                                                                                                                                                                                                                                                                                                       |
| 8                   | For what type of analysis or purpose?                                                                                                               | -                                                                                                                                                                                                                                                                                                                                                                                                                                                                                                                                                                                                                                                                                                                                                       |
| 9                   | How or where can the data/documents be obtained?                                                                                                    | -                                                                                                                                                                                                                                                                                                                                                                                                                                                                                                                                                                                                                                                                                                                                                       |
| 10                  | Any other restrictions?                                                                                                                             | -                                                                                                                                                                                                                                                                                                                                                                                                                                                                                                                                                                                                                                                                                                                                                       |
